# Supplementary material for: Rational design of a reusable chemodosimeter for the selective detection of Hg2+
Source: Royal Society of Chemistry journal article supplement (doi:10.1039/c3ta10412e), 2013-01-01
Supplement: c3ta10412e.pdf [file c3ta10412e.pdf]

## Supporting information

# Rational Design of a Reusable Chemodosimeter for the Selective Detection of Hg<sup>2+</sup>

*Wei-tao Gong, Bei Gao, Jian-zhang Zhao, Gui-ling Ning\**

*State Key Laboratory of Fine Chemicals, School of Chemical Engineering, Dalian University  
of Technology, P.O. Box 43, Comprehensive Building, No. 2 Ling Gong Road, High  
Technology Zone, Dalian, 116024, P.R.China*

*E-mail: wtgong@dlut.edu.cn; ninggl@dlut.edu.cn.*

|                                                                |    |
|----------------------------------------------------------------|----|
| <b>Apparatus and reagents</b> .....                            | 2  |
| <b>Synthesis and structural characterization of 2</b> .....    | 2  |
| <b>Synthesis and structural characterization of AHNA</b> ..... | 2  |
| <b>Synthesis of compound Hg-AHNA</b> .....                     | 3  |
| <b>General procedure for Hg<sup>2+</sup> detection</b> .....   | 3  |
| Fig.S1.....                                                    | 4  |
| Fig.S2-S3.....                                                 | 5  |
| Fig.S4.....                                                    | 6  |
| Fig.S5-S6.....                                                 | 7  |
| Fig.S7.....                                                    | 8  |
| Fig.S8-S9.....                                                 | 9  |
| Fig.S10-S11.....                                               | 10 |
| Fig.S12-S13.....                                               | 11 |
| Fig.S14.....                                                   | 12 |
| Fig.S15.....                                                   | 13 |
| Table 1.....                                                   | 14 |

## 1 apparatus and reagents

All cations in the form of perchloride salts were purchased from Sigma-Aldrich and used without further purification. The solutions of anions were prepared from their sodium salts. All solvents used for spectroscopic test are spectroscopic grade. A JASCO FP-6300 spectrofluorimeter was used for fluorescence measurements.  $^1\text{H}$  NMR and  $^{13}\text{C}$  NMR spectra were obtained on a Bruker AVANCE-400 spectrometer. Mass spectra were measured on an Agilent 6310 MS spectrometer and a Q-TOF MS spectrometer.

## 2. Synthesis and structural characterization of **2** (4- Allyloxy-N-butyl-1,8-naphthalimide)

4-Hydroxy-N-butyl-1, 8-naphthalimide **1** (1.4 g, 4.7mmol) and  $\text{K}_2\text{CO}_3$  (0.94 g, 6.8mmol) was suspended in acetone (30 ml). Then, the mixture was refluxed for 12 h under Ar. After cooled, inorganic salt was filtrated off. After evaporation of the filtrate, the product was purified with silica gel chromatography, eluted with  $\text{CH}_2\text{Cl}_2$  and petroleum ether (1:3) to afford **2** as pure white solid in 69% yield.(1.0 g) :  $^1\text{H}$  NMR (400 Hz,  $\text{CDCl}_3$ )  $\delta$ : 8.59 (d,  $J = 8$  Hz , 2H), 8.52(d,  $J = 8$  Hz , 1H ), 7.68-7.72 (m, 1H), 7.02(d,  $J = 8$  Hz , 1H), 6.13-6.23 (m, 1H), 5.41-5.57 (m, 2H), 4.85(d,  $J = 4$  Hz , 2H ), 4.15-4.18 (m, 2H), 1.67-1.73 (m, 2H), 1.42-1.48 (m, 2H), 0.90-1.00 (m, 3H);  $^{13}\text{C}$  NMR (400 MHz,  $\text{CDCl}_3$ )  $\delta$ :13.89, 20.42, 30.27, 40.10, 69.55, 106.20, 115.20, 118.73, 122.46, 123.56, 125.92, 128.62, 129.40, 131.51,131.87,133.26,159.61,163.92,164.52 ; HRMS (ESI)  $m/z$  calcd for  $\text{C}_{19}\text{H}_{19}\text{NO}_3\text{Na}$   $[\text{M}+\text{Na}]^+$ :332.1263; found,332.1269.

## 2. Synthesis of compound AHNA (2-allyl-4-hydroxy-N-butyl-1,8-naphthalimide)

4- Allyloxy-N-butyl-1, 8-naphthalimide **2**(1.0 g, 3.32mmol) was dissolved in N-methylpyrrolidone (10 mL) and refluxed for 3 h at 220 °C under Ar. After evaporation of the solvent, the product was purified with silica gel chromatography, eluted with ethyl acetate and petroleum ether (1:15) to afford **AHNA** as dark yellow solid in 22% yield (0.22g). :  $^1\text{H}$  NMR (400 Hz,  $\text{CDCl}_3$ )  $\delta$ : 8.51-8.59 (m, 2H), 8.40 (s, 1H ), 7.69-7.73 (m, 1H), 6.49(s, 1H), 6.06 -6.14 (m, 1H),5.37(d,  $J = 12$  Hz , 2H ), 4.16-4.19 (m,

2H), 3.70 (d,  $J = 4$  Hz, 2H), 1.67-1.73 (m, 2H), 1.42-1.47 (m, 2H), 0.95-0.99 (m, 3H);  $^{13}\text{C}$  NMR (400 MHz,  $\text{CDCl}_3$ )  $\delta$ : 13.89, 20.41, 30.28, 35.58, 40.15, 115.04, 118.43, 119.68, 122.42, 122.81, 125.99, 128.35, 128.78, 131.23, 134.98, 135.00, 156.27, 164.10, 164.60; HRMS (ESI)  $m/z$  calcd for  $\text{C}_{19}\text{H}_{18}\text{NO}_3$   $[\text{M}-\text{H}]^+$ : 308.1287; found, 308.1281.

## 2. Synthesis of compound Hg-AHNA

2-Allyl-4-hydroxy-N-butyl-1,8-naphthalimide (60 mg, 0.19 mmol) was dissolved in Dimethylsulfoxide (5 ml) and 4995 ml Tris-HCl buffer solution (pH=7.4), then  $\text{HgCl}_2$  (0.515 mg, 1.9 mmol) was added. After stirring overnight, the solution was extracted with dichloromethane. After evaporation of the solvent, the product was recrystallized from ethyl acetate to yield dark yellow crystals of **Hg-AHNA** in 40% yield (0.42 g):  $^1\text{H}$  NMR (400 Hz,  $\text{CDCl}_3$ )  $\delta$ : 8.58 (d,  $J = 8$  Hz, 1H), 8.45 (s, 1H), 8.26 (d,  $J = 8$  Hz, 1H), 7.68-7.72 (m, 1H), 5.56-5.63 (m, 1H), 4.15-4.18 (m, 2H), 3.70-3.76 (m, 1H), 3.06-3.12 (m, 1H), 2.55-2.59 (m, 1H), 2.42-2.46 (m, 1H), 1.67-1.75 (m, 2H), 1.42-1.47 (m, 2H), 0.96-0.99 (m, 3H);  $^{13}\text{C}$  NMR (400 MHz,  $\text{DMSO}-d_6$ )  $\delta$ : 13.89, 20.41, 30.28, 35.58, 40.15, 115.04, 118.43, 119.68, 122.42, 122.81, 125.99, 128.35, 128.78, 131.23, 134.98, 135.00, 156.27, 164.10, 164.60; HRMS (ESI)  $m/z$  calcd for  $\text{C}_{19}\text{H}_{19}\text{NO}_3\text{ClHg}$   $[\text{M}+\text{H}]^+$ : 546.0760; found, 546.0734.

## 3. General procedure for $\text{Hg}^{2+}$ detection

A stock solution of probe **AHNA** ( $10^{-2}$  mol/L) was prepared by dissolving the requisite amount of **AHNA** in DMSO, and solutions of various metal ions were prepared by dissolving their salts in water. All measurements were made according to the following procedure. In a small cell, 40  $\mu\text{L}$  **AHNA** of the stock solution of **AHNA** and 3940  $\mu\text{L}$  Tris-HCl buffer solution (pH=7.4) were mixed, followed by addition of an appropriate volume of metal ions solution, then the fluorescence sensing of different metal ions was run.

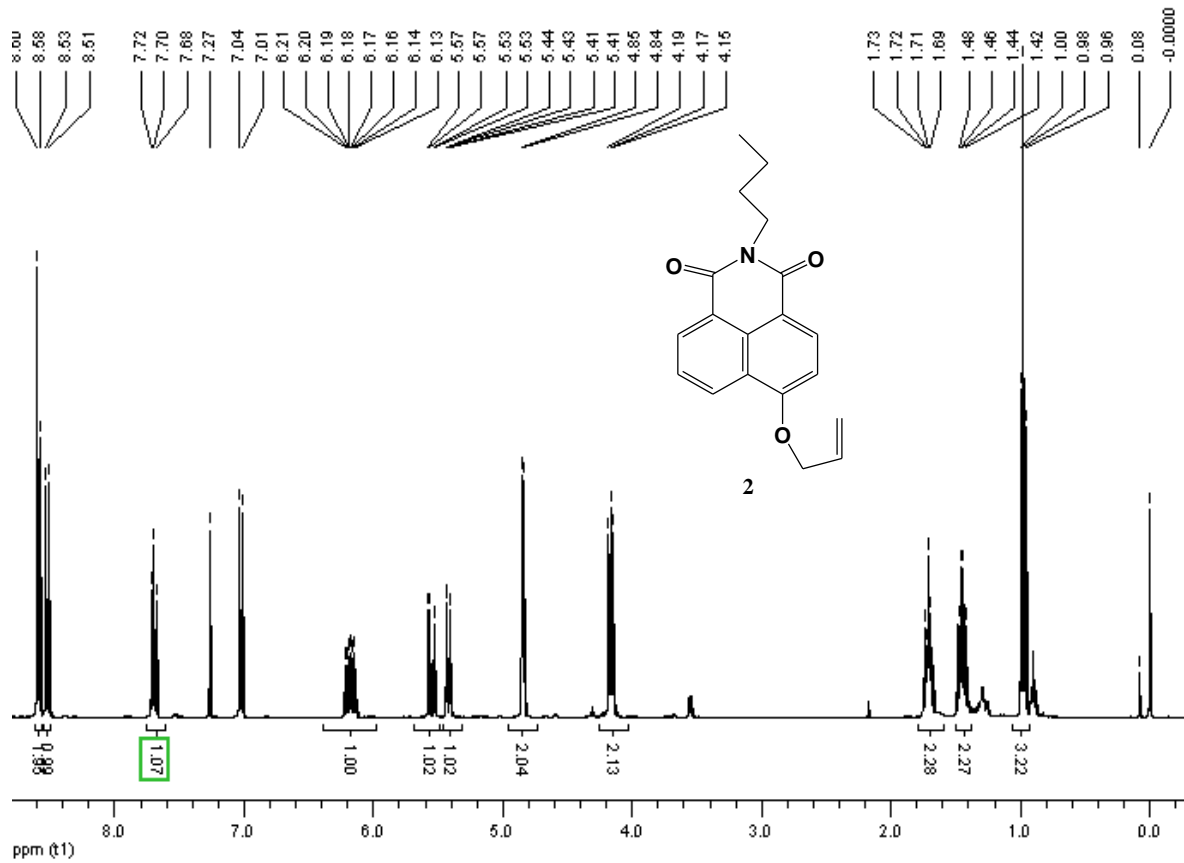

Figure S1. <sup>1</sup>H NMR for compound **2** in CDCl<sub>3</sub>

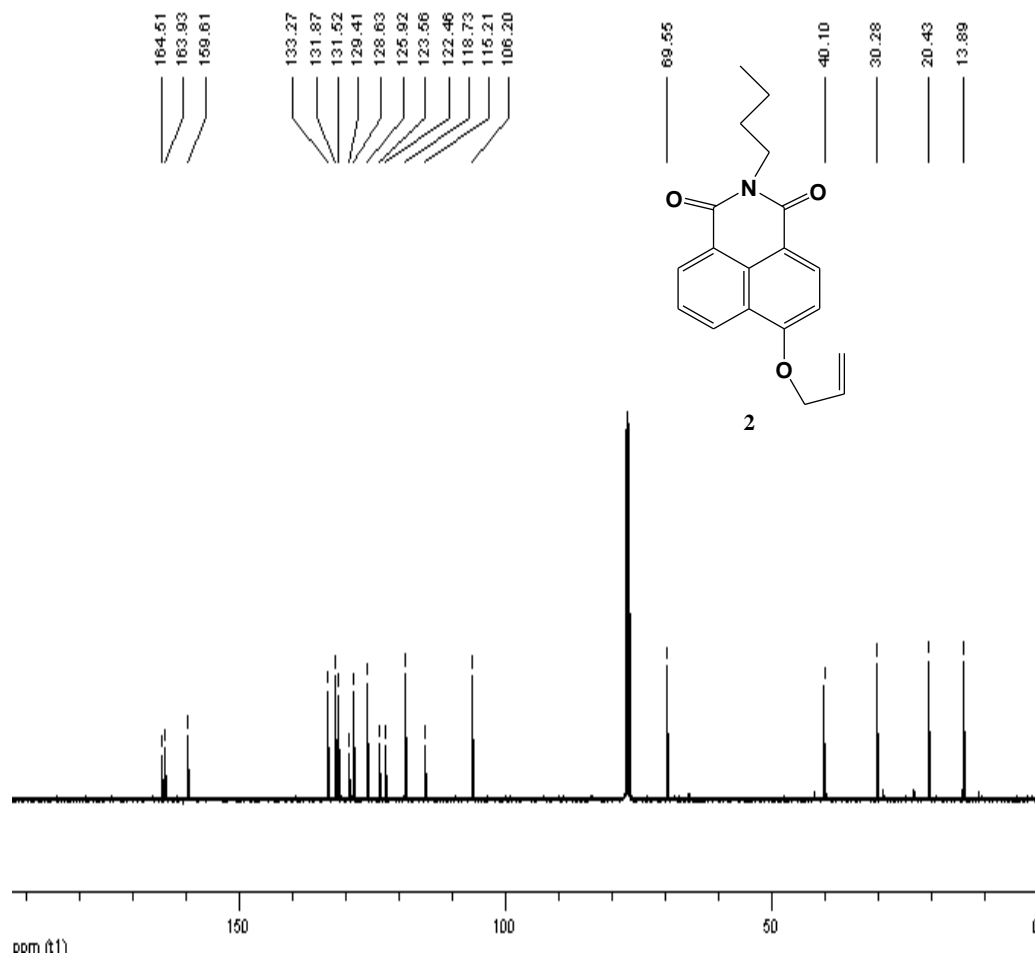

Figure S2.  $^{13}\text{C}$  NMR for compound 2 in  $\text{CDCl}_3$

GP

15:31:49

12042034 46 (0.860) AM (Cen,2, 80.00, Ht,5000.0,0.00,1.00); Sm (Mn, 2x1.00); Cm (42:53)

1.94e3

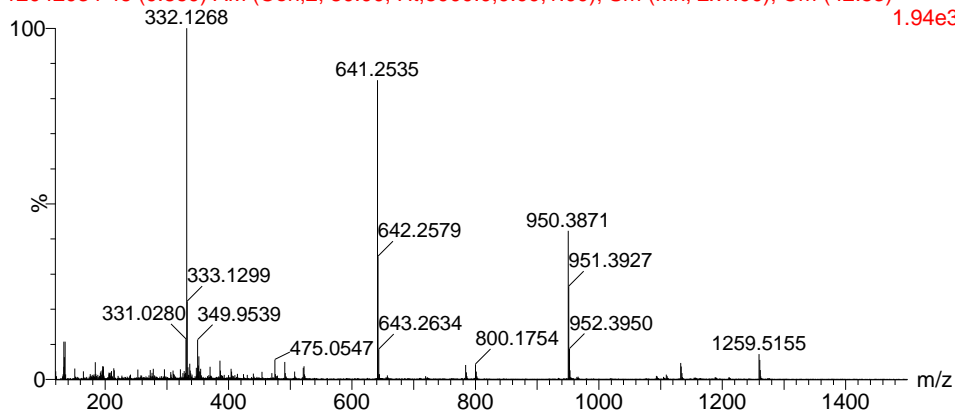

Figure S3. HRMS spectrum of compound 2

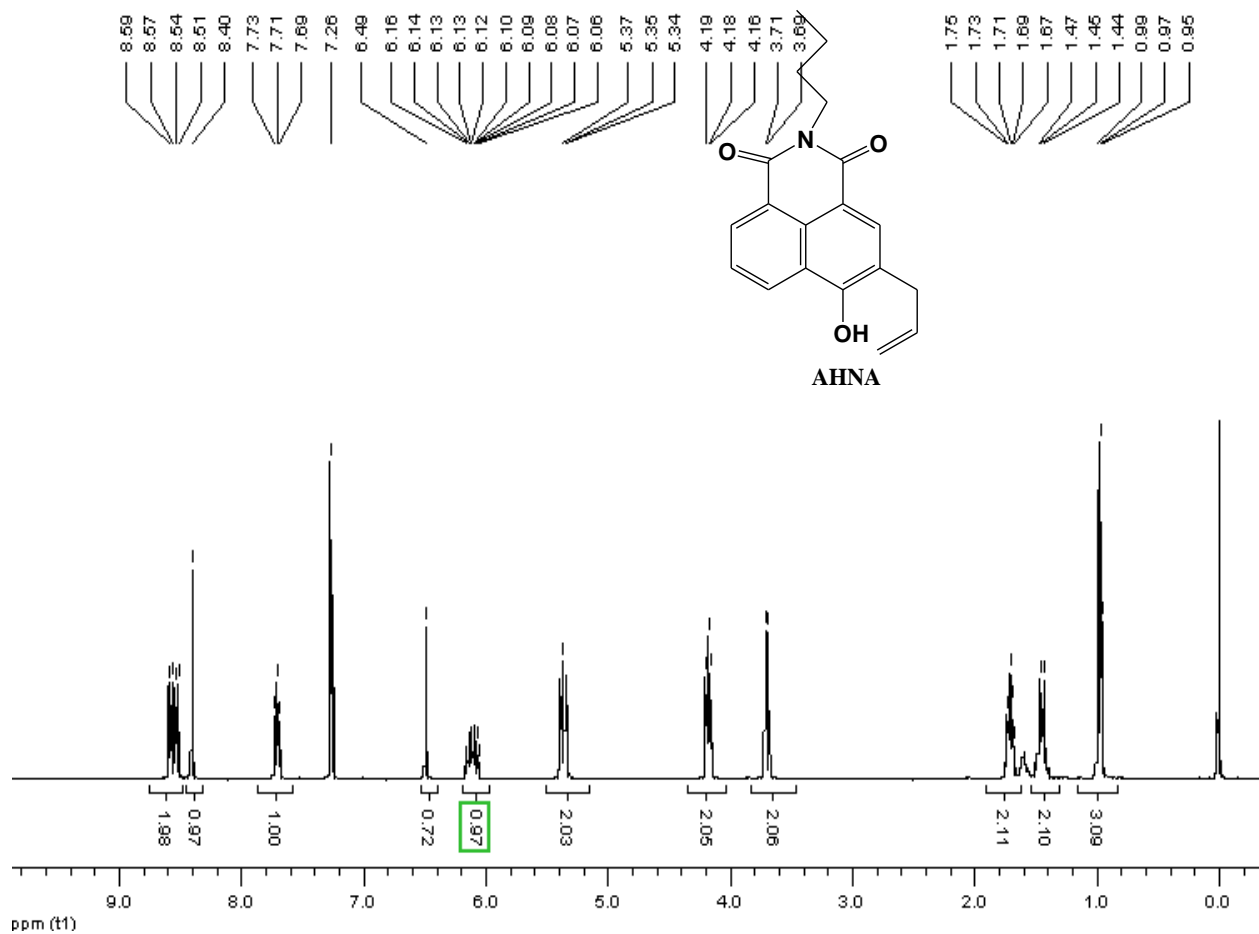

**Figure S4.** <sup>1</sup>H NMR for compound AHNA in CDCl<sub>3</sub>.

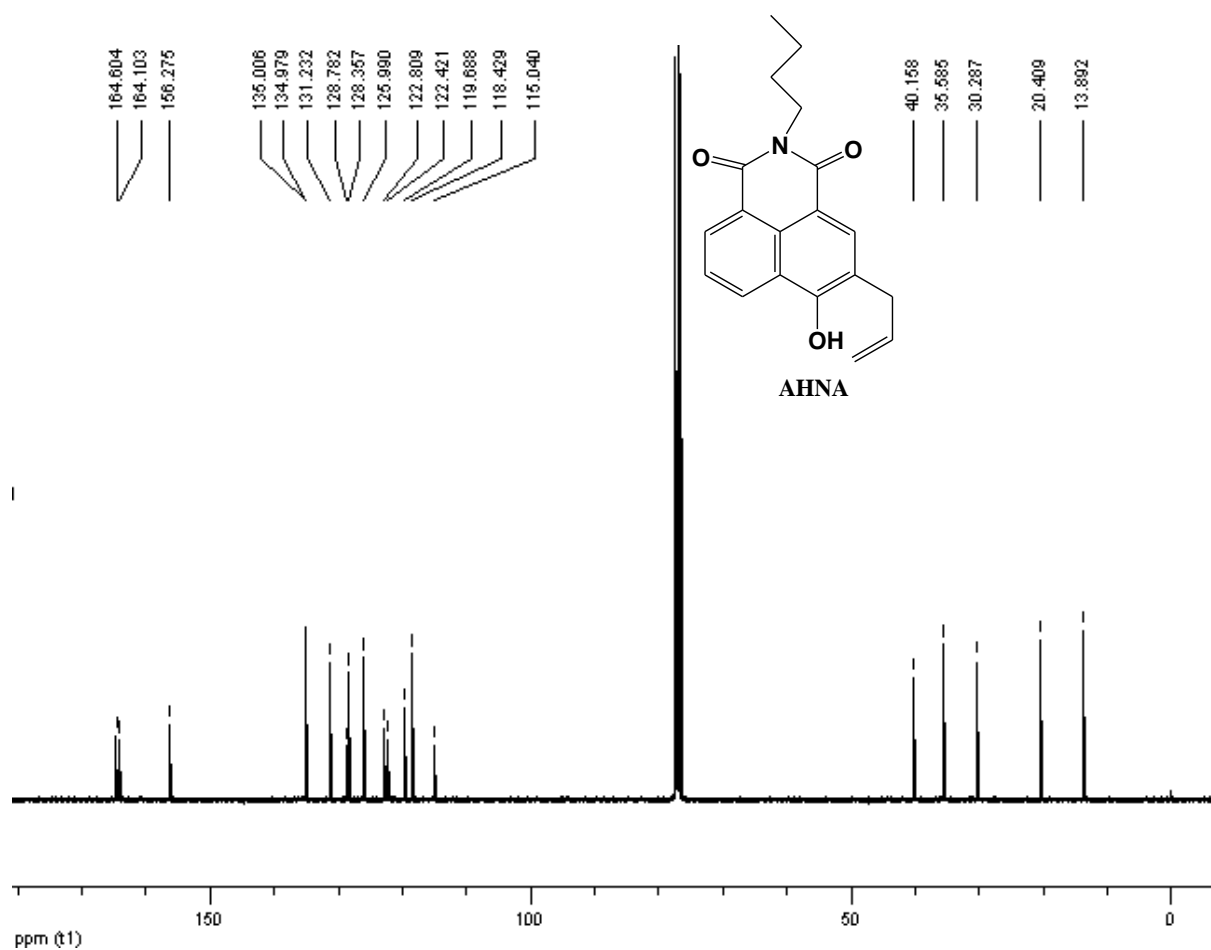

**Figure S5.**  $^{13}\text{C}$  NMR for compound AHNA in  $\text{CDCl}_3$ .

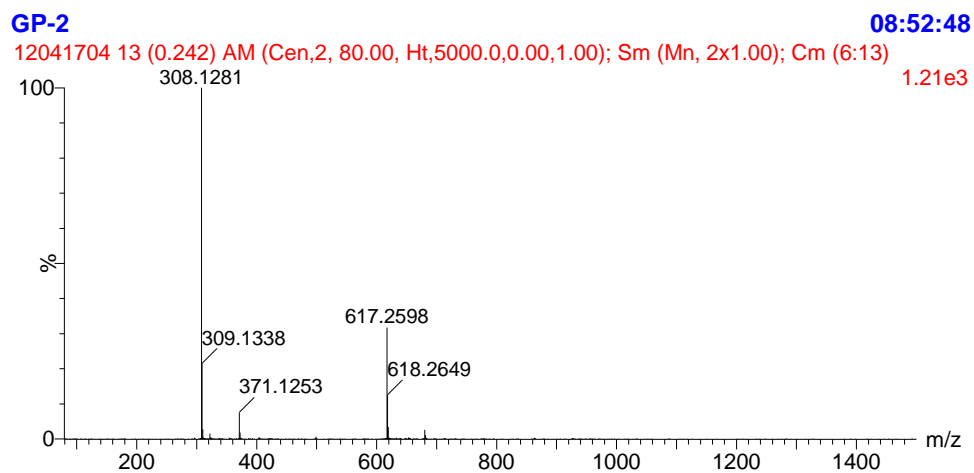

**Figure S6.** HRMS spectrum of compound AHNA  $[\text{M}-\text{H}]^+$

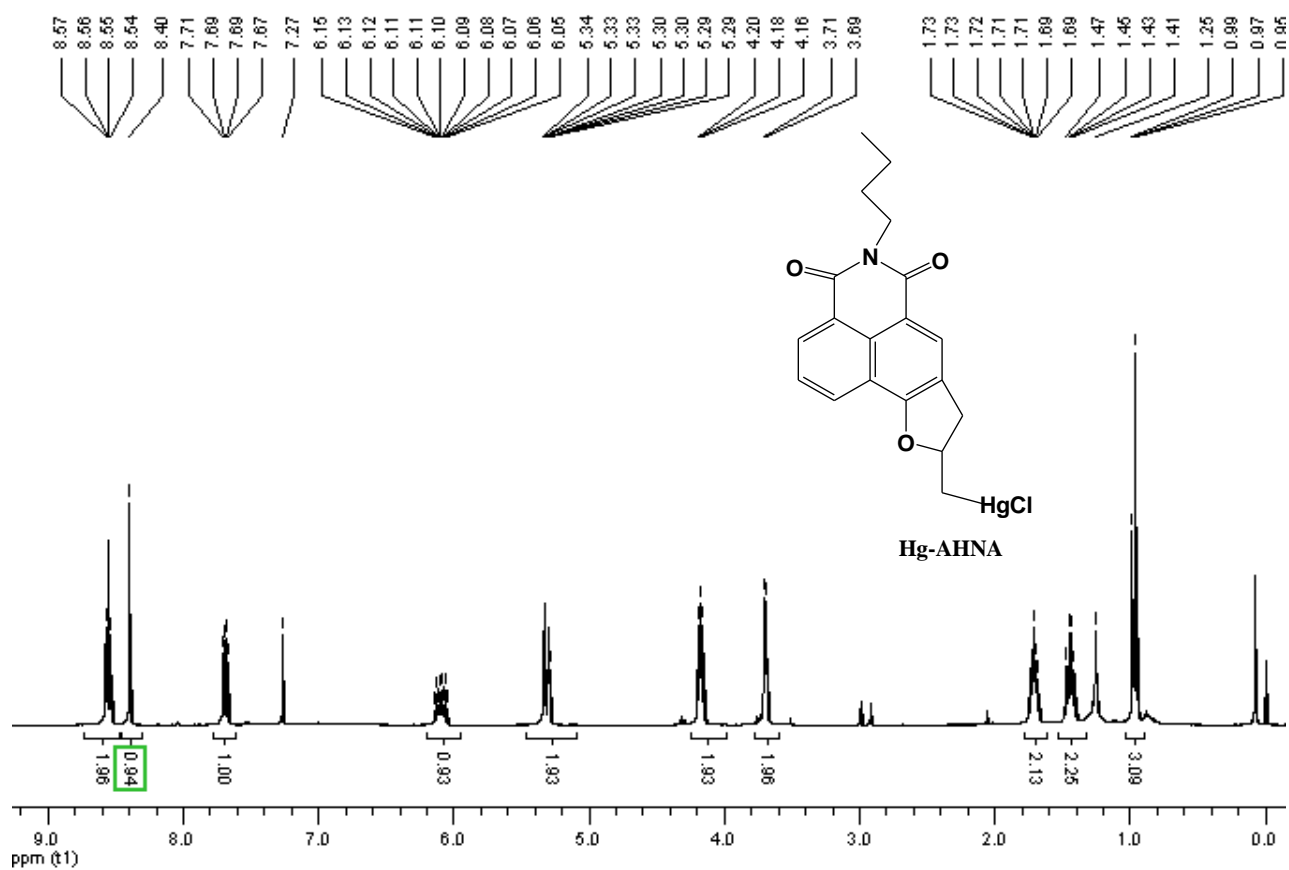

**Figure S7.**  $^1\text{H}$  NMR for compound **Hg-AHNA** in  $\text{CDCl}_3$



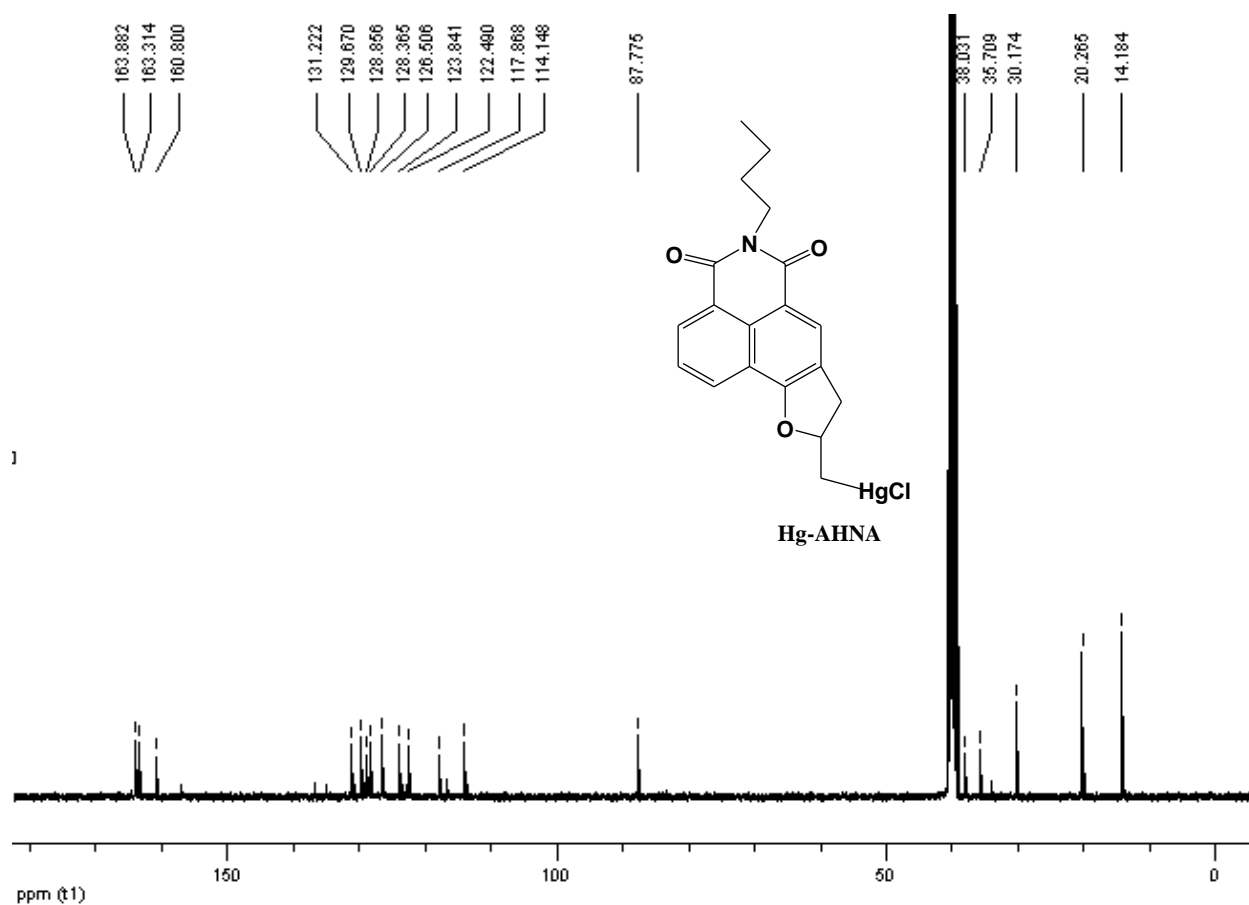

**Figure S8.**  $^{13}\text{C}$  NMR for compound **Hg-AHNA** in  $\text{DMSO-d}_6$

GB(CHCA)

12051400 14 (0.464) Cn (Cen,4, 50.00, Ht); Sm (Mn, 2x3.00); Sb (15,10.00); Cm (12:20)

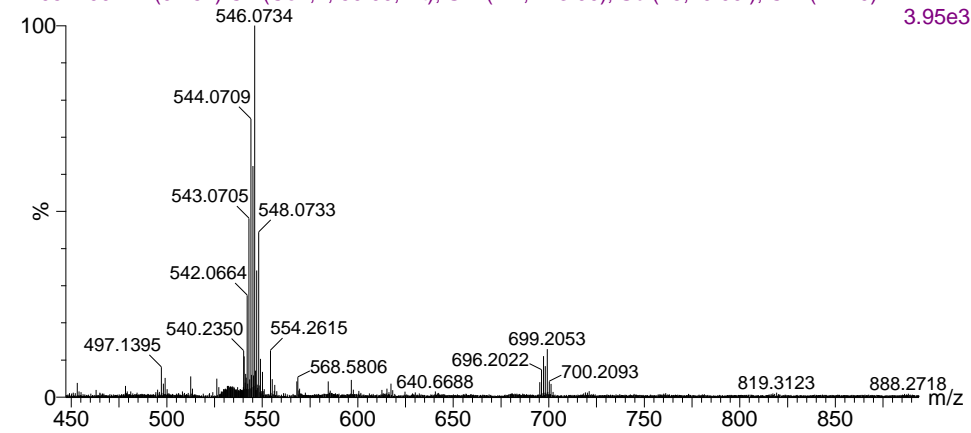

**Figure S9.** HRMS spectrum of compound **Hg-AHNA**

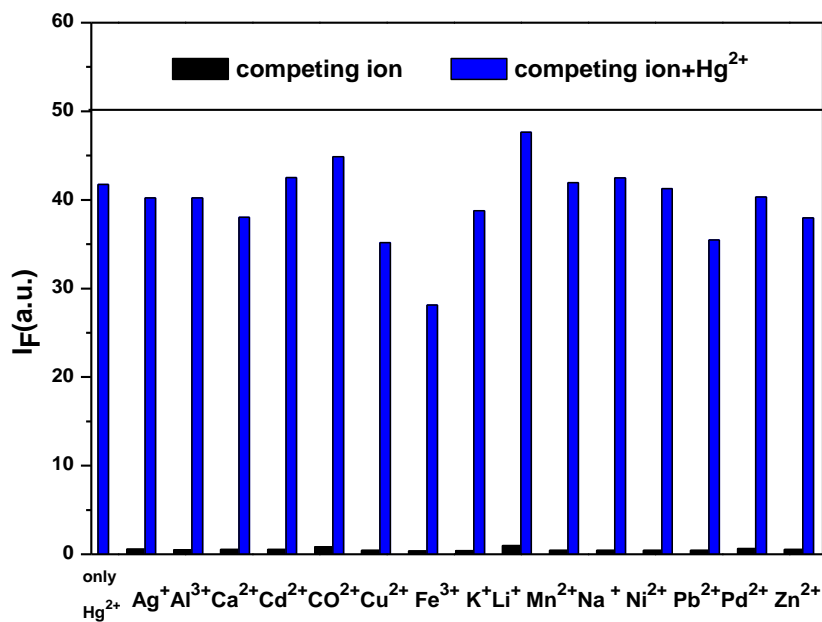

**Figure S10.** Changes in fluorescence of AHNA (10  $\mu$  M in Tris-HCl buffer solution containing 1% DMSO, pH = 7.4) upon addition of Hg<sup>2+</sup> (5 equiv.) with various metal ions (5 equiv.)

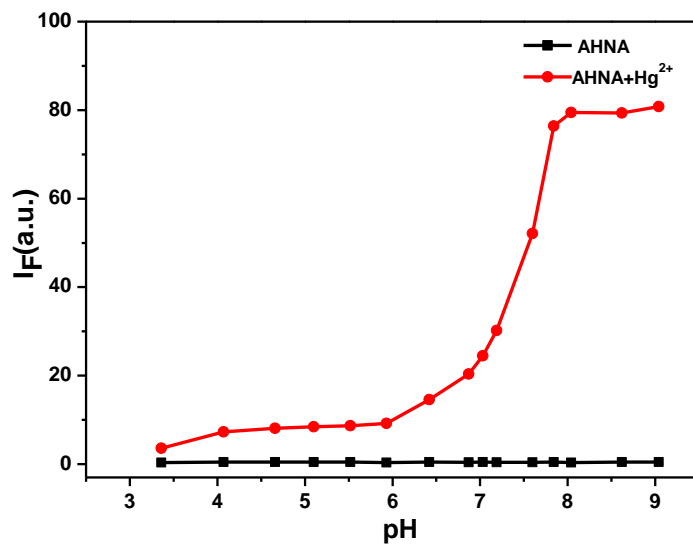

**Figure S11.** Changes in fluorescence of AHNA (black) and AHNA with Hg<sup>2+</sup> (red) in buffer solution with different pH (10  $\mu$  M in Tris-HCl buffer solution containing 1% DMSO, pH = 7.4, excitation at 400 nm, and emission was integrated at 500 nm).

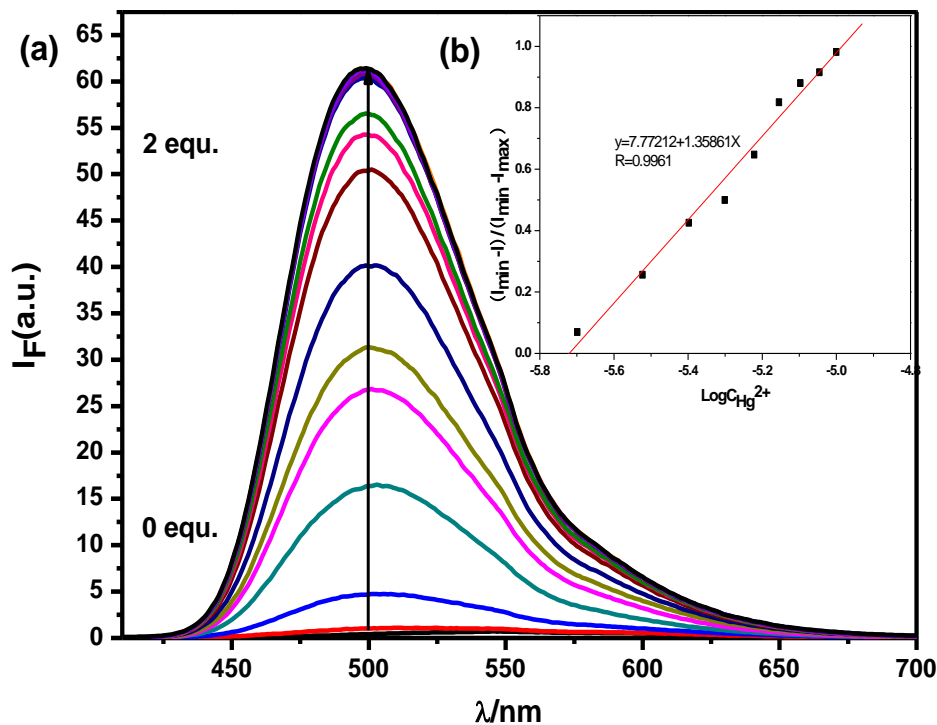

**Figure S12.** (a) Fluorescence emission spectra of AHNA (10  $\mu$  M in Tris-HCl buffer solution containing 1% DMSO, pH = 7.4) responding to different concentrations of  $\text{Hg}^{2+}$  (0-2 equiv., excitation at 400 nm). (b) Normalized response of fluorescence signal to changing  $\text{Hg}^{2+}$  concentrations in Tris-HCl buffer solution (10  $\mu$  M containing 1% DMSO, pH = 7.4). (Ex. 400 nm; Em. 500 nm).

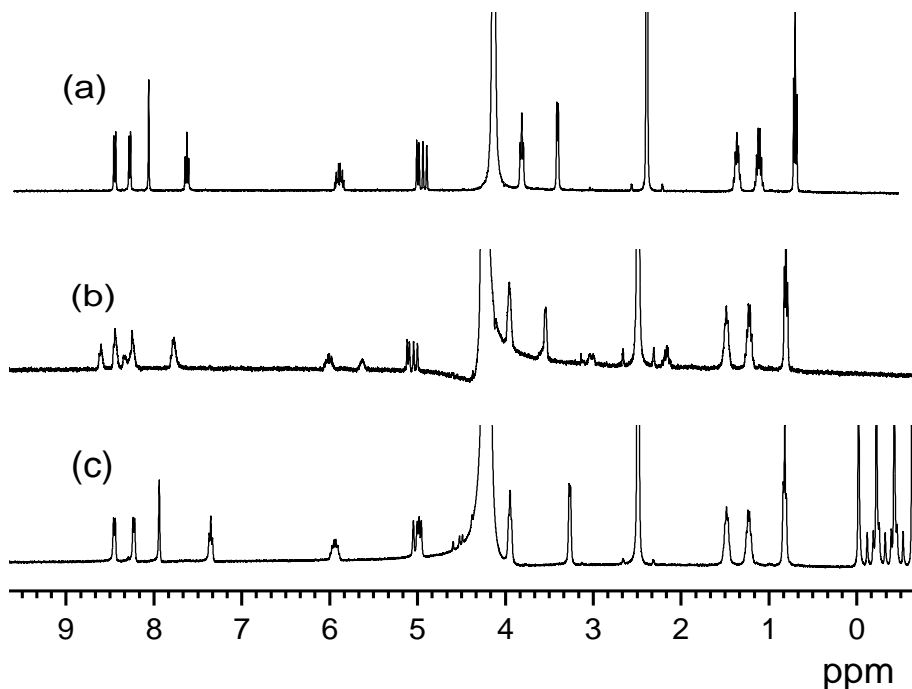

**Figure S13.**  $^1\text{H}$  NMR spectra for (a) AHNA, (b) AHNA +  $\text{HgCl}_2$  (5.0 equiv.) and (c) AHNA +  $\text{HgCl}_2$  +  $\text{NaBH}_4$  in  $\text{DMSO-d}_6$  containing 30%  $\text{D}_2\text{O}$

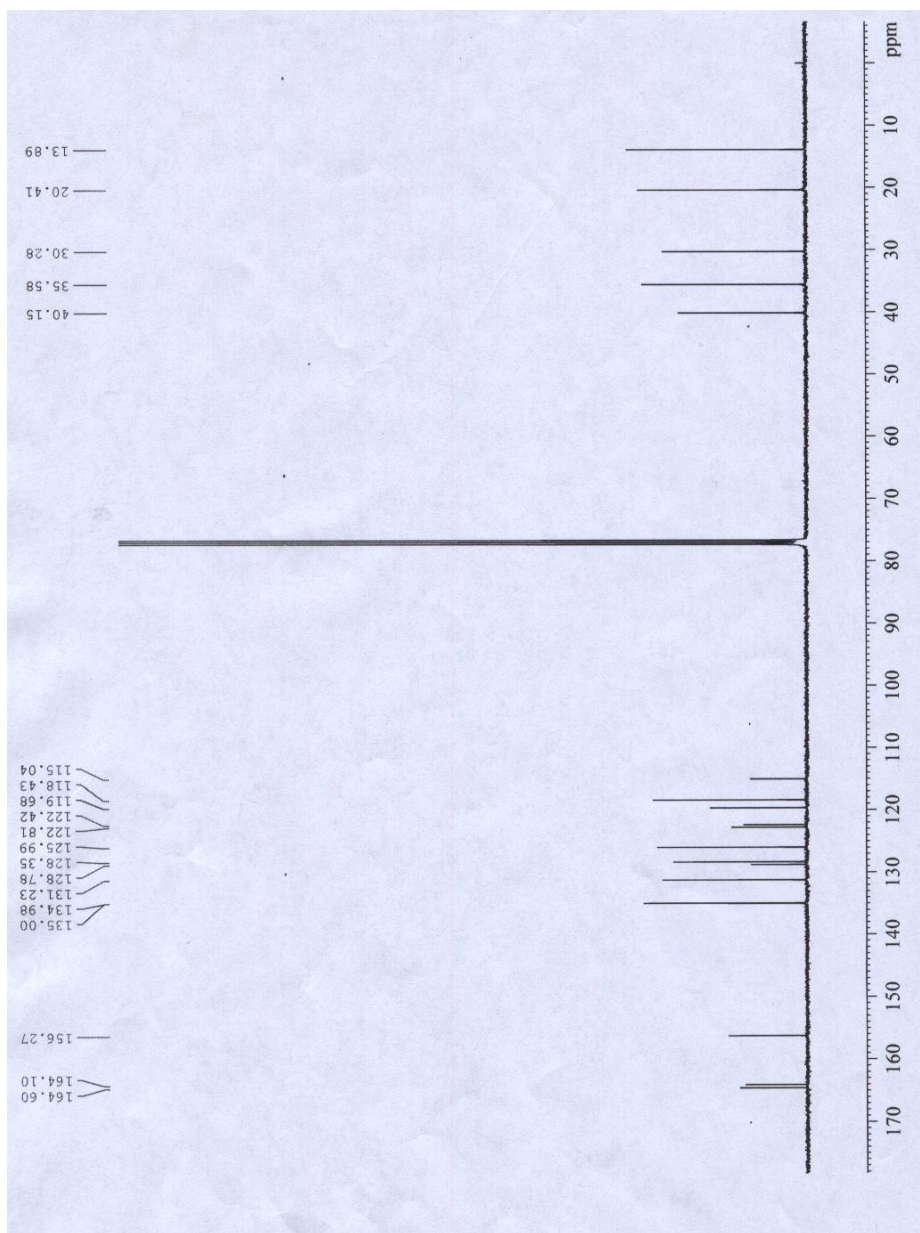

**Figure S14.**  $^{13}\text{C}$  NMR spectrum of compound recycled AHNA

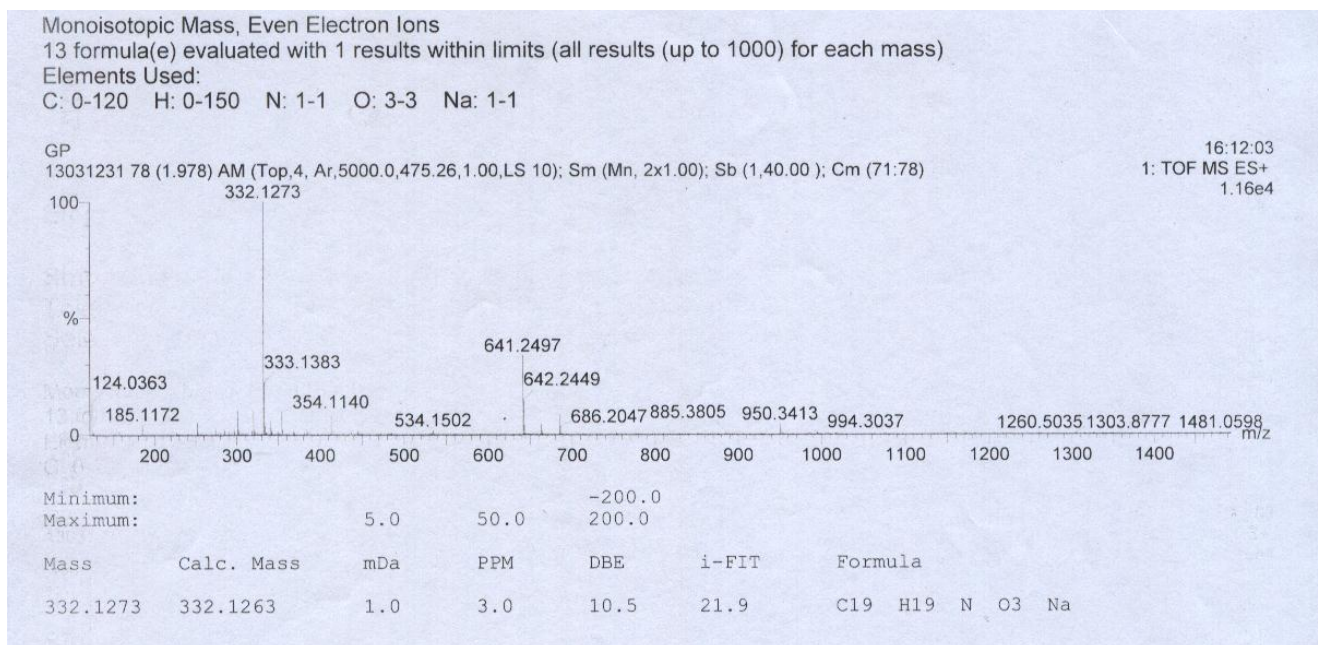

**Figure S15.** HRMS spectrum of compound recycled AHNA  $[M+Na]^+$

**Table 1.** Crystallographic Data and Structure Refinements for single crystals of compounds **AHNA** and **Hg-AHNA**.

| Compound reference                           | AHNA                                            | Hg-AHNA                                             |
|----------------------------------------------|-------------------------------------------------|-----------------------------------------------------|
| Chemical formula                             | C <sub>19</sub> H <sub>19</sub> NO <sub>3</sub> | C <sub>19</sub> H <sub>18</sub> ClHgNO <sub>3</sub> |
| CCDC Number                                  | 917431                                          | 917432                                              |
| Formula Mass                                 | 309.35                                          | 544.38                                              |
| Crystal system                               | Monoclinic                                      | Tetragonal                                          |
| a/Å                                          | 4.9619(4)                                       | 23.616(3)                                           |
| b/Å                                          | 13.1060(14)                                     | 23.616(3)                                           |
| c/Å                                          | 12.2014(9)                                      | 6.9313(15)                                          |
| α/°                                          | 90.00                                           | 90.00                                               |
| β/°                                          | 91.684(6)                                       | 90.00                                               |
| γ/°                                          | 90.00                                           | 90.00                                               |
| Unit cell volume/Å <sup>3</sup>              | 793.12(12)                                      | 3865.6(10)                                          |
| Temperature/K                                | 296(2)                                          | 296(2)                                              |
| Space group                                  | P2(1)                                           | P4(2)/mbc                                           |
| No. of formula units per unit cell, Z        | 2                                               | 8                                                   |
| No. of reflections measured                  | 4293                                            | 20463                                               |
| No. of independent reflections               | 2456                                            | 1863                                                |
| R <sub>int</sub>                             | 0.0164                                          | 0.0742                                              |
| Final R <sub>1</sub> values (I > 2σ(I))      | 0.0439                                          | 0.0436                                              |
| Final wR(F <sub>2</sub> ) values (I > 2σ(I)) | 0.1161                                          | 0.1004                                              |
| Final R <sub>1</sub> values (all data)       | 0.0584                                          | 0.0825                                              |
| Final wR(F <sub>2</sub> ) values (all data)  | 0.1252                                          | 0.1107                                              |

$$R_1 = \sum ||F_o| - |F_c|| / \sum |F_o| ; wR_2 = \{ \sum [w(F_o^2 - F_c^2)^2] / \sum [w(F_o^2)]^2 \}^{1/2}$$
